# Supplementary material
Source: PubMed Central journal article supplement (PMC6094357)
Supplement: mmc1.pdf [file mmc1.pdf]

YMTHE, Volume 26

## **Supplemental Information**

### **RNAi-Based GluN3A Silencing Prevents and Reverses Disease Phenotypes Induced by Mutant huntingtin**

**Sonia Marco, Alvaro Murillo, and Isabel Pérez-Otaño**

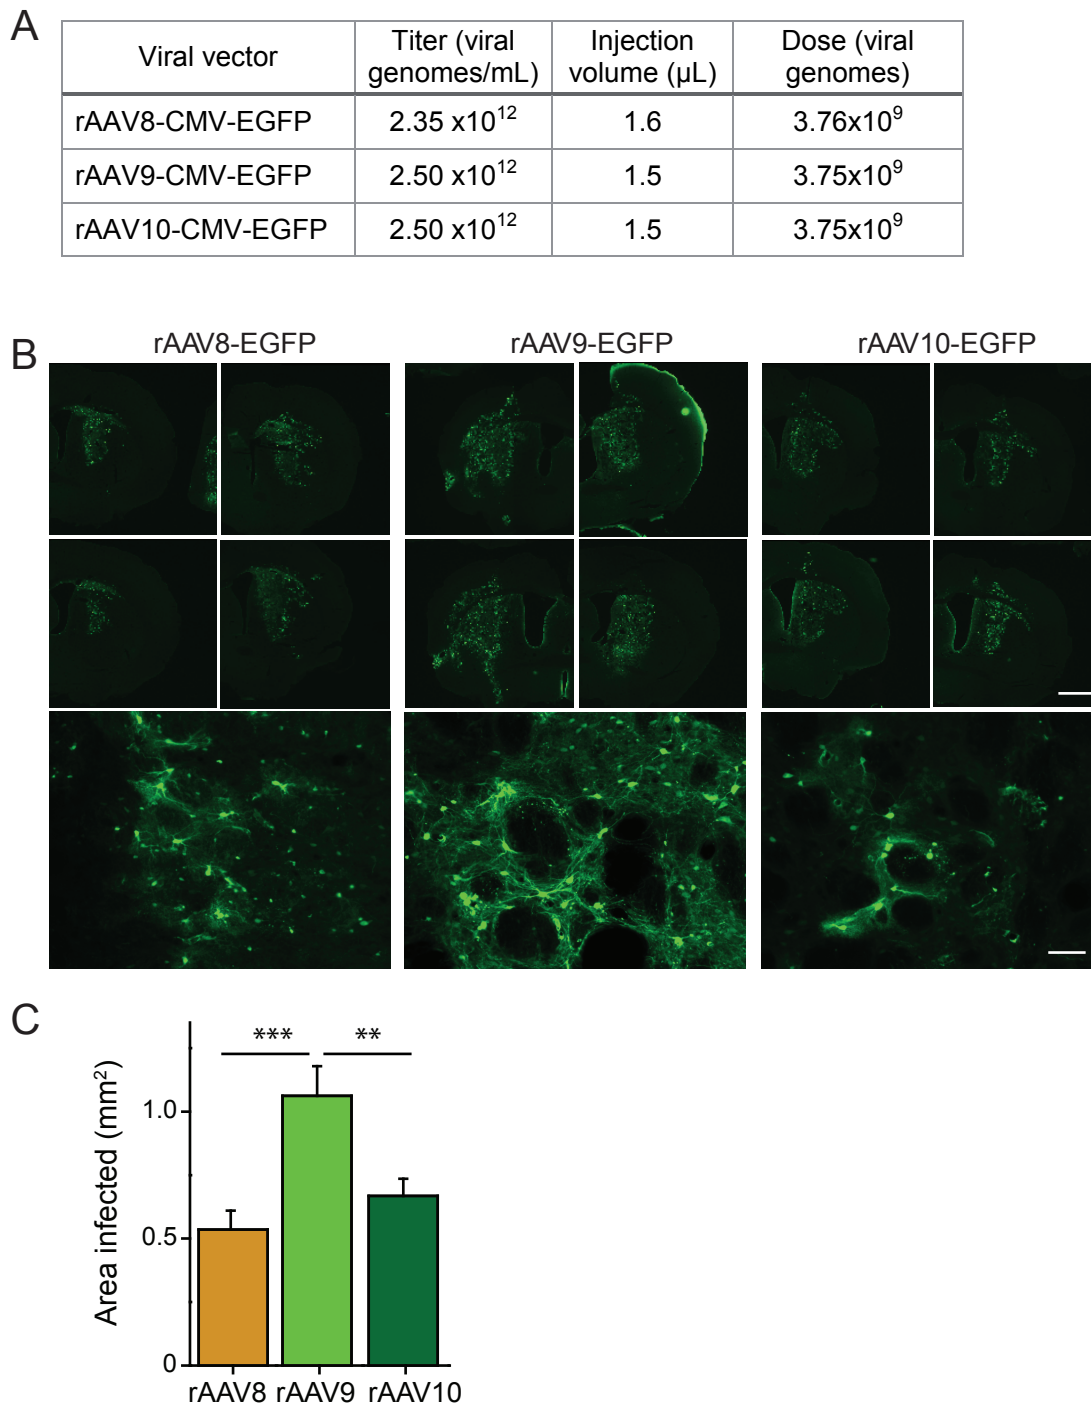

**Figure S1. Comparison of transduced striatal area between rAAV serotypes upon a single striatal injection** (A) Titers and volumes of injection for rAAVs used in serotype comparison. (B) Photomicrographs of coronal sections from mice bilaterally injected into the striatum with rAAV8-, rAAV9-, or rAAV10-EGFP, and sacrificed 2 weeks later. Scale bar: 1mm and 100  $\mu\text{m}$ . (C) Quantification of striatal area displaying GFP fluorescence in series of mosaic images separated 240  $\mu\text{m}$ . Data are mean  $\pm$  S.E.M. (n=3 animals per serotype; \*\* P < 0.01, \*\*\* P < 0.001, one-way ANOVA followed by Bonferroni multiple comparison test).

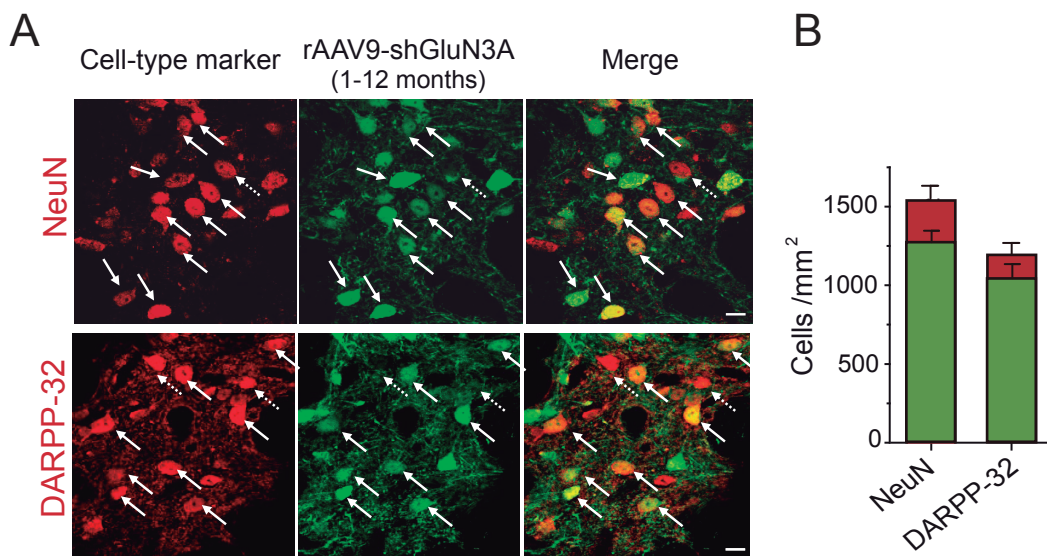

**Figure S2. Long-lasting transduction of striatal neurons by rAAV9-shGluN3A**

(A) Single confocal images of representative striatal sections from a YAC128 mouse receiving rAAV9-shGluN3A at 1 month of age (green) and stained by immunohistochemistry for NeuN or DARPP-32 at 12 months (red). Solid arrows: examples of colocalization; dashed arrows: no colocalization. Scale bar: 10  $\mu$ m.

(B) Quantification of number of striatal neurons transduced by rAAV9-shGluN3A. Data are mean  $\pm$  S.E.M. (n= 3 mice, 2-3 striatal fields analysed and averaged per mice).

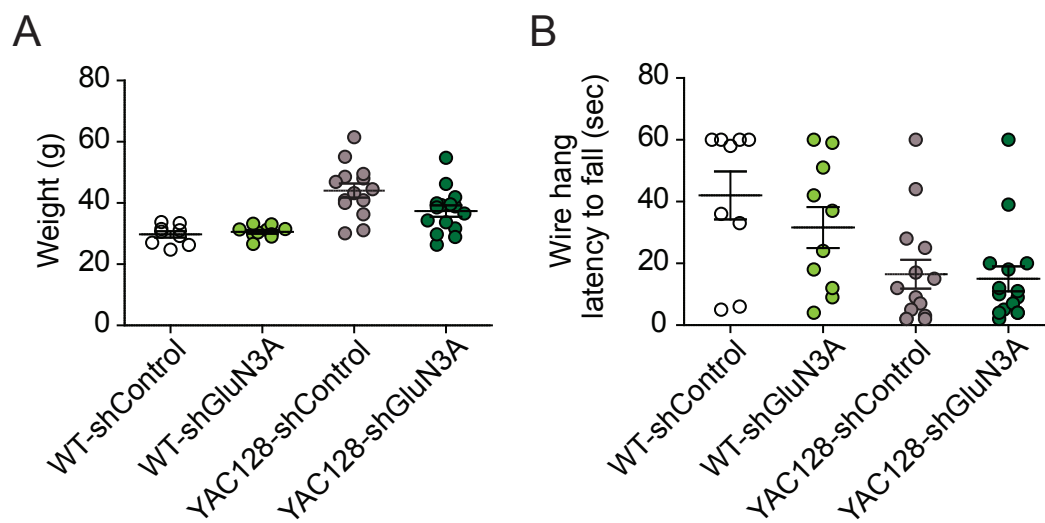

**Figure S3. Body weight and muscular strength are not affected by rAAV9-shGluN3A intrastratial injection.**

(A) Body weight is increased in 10-12 month-old YAC128 mice compared to WT mice. Injection into the striatum of rAAV9-shGluN3A has no significant effect in body weight. Two-way ANOVA: genotype x shRNA interaction  $F(1,44) = 3.95$ ,  $P = 0.0530$ ; shRNA  $F(1,44) = 2.37$ ,  $P = 0.1305$ ; genotype  $F(1,44) = 31.1$ ,  $P < 0.0001$ .

(B) Latency to fall from the wire. Two-way ANOVA: genotype x shRNA  $F(1,44) = 0.635$ ,  $P = 0.4298$ ; shRNA  $F(1,44) = 1.14$ ,  $P = 0.2924$ ; genotype  $F(1,44) = 14.2$ ,  $P = 0.0005$ .
